# Supplementary material for: Wildlife–Livestock Host Community Maintains Simultaneous Epidemiologic Cycles of Mycoplasma conjunctivae in a Mountain Ecosystem
Source: MDPI journal article supplement (doi:10.3390/vetsci11050217), 2024-05-14
Supplement: s1 [file s1]

**Table S1.** Primers and probes used in this study for *Mycoplasma conjunctivae* detection and Sanger DNA sequence analysis.

| Primers and probes | Sequences (5'-3')                              | Use                    |
|--------------------|------------------------------------------------|------------------------|
| LPPS-TM-L          | CAGCTGGTGTAGCACTTTTTGC                         | qPCR                   |
| LPPS-TM-R          | TTAACACCTATGCTCTCGTCTTTGA                      | qPCR                   |
| LPPS-TM-FT         | TGCTTCGACTACCAAATATGATGGTGATCCTCT <sup>a</sup> | qPCR - probe           |
| Serstart3          | TTTAGTAGACTCCACTTCACC                          | PCR                    |
| Serstart2          | CACTATACTTAACAGATAGTCC                         | Nested PCR, Sequencing |
| Serstart0          | ATACTCAAAGTGGAAATAATGGAA                       | Sequencing             |
| Serend0            | GCAACAACAATAGTAAGAGCAG                         | Sequencing             |
| lppTA2             | TTTGATCTCTCCACCTTCAGC                          | PCR                    |
| lppTA              | GGCACTAATAGTGCCTAATTC                          | Nested PCR             |

<sup>a</sup>5' 6FAM reporter dye and 3' TAMRA quencher.
